# Supplementary material for: Using an Administrative and Clinical Database to Determine the Early Spread of COVID-19 at the US Department of Veterans Affairs during the Beginning of the 2019–2020 Flu Season: A Retrospective Longitudinal Study
Source: MDPI journal article supplement (doi:10.3390/v14020200), 2022-01-20
Supplement: s1 [file s1]

## **Online Supplement**

Figures S1 a-c. Rates per 1,000 ED encounters for COVID-like symptoms, influenza diagnoses, and non-influenza ILI by state (CA, TX, FL) and by flu season (2015-2020).

Figures S2 a-c. Rates per 1,000 ED encounters for shortness of breath, cough, and fever (CA, TX, FL) (2015-2020).

Table S1. Demographic characteristics of VA patients visiting ED from October 1, 2015 – September 30, 2020 by state and season.

Table S2. Demographic characteristics of VA patients visiting ED for CLS from October 1, 2015 – September 30, 2020 by state and season.

**Figures S1 a-e. Rates per 1,000 ED encounters for COVID-like symptoms, influenza diagnoses, and non-influenza ILI by state (CA, TX, FL) and by flu season (2015-2020).**

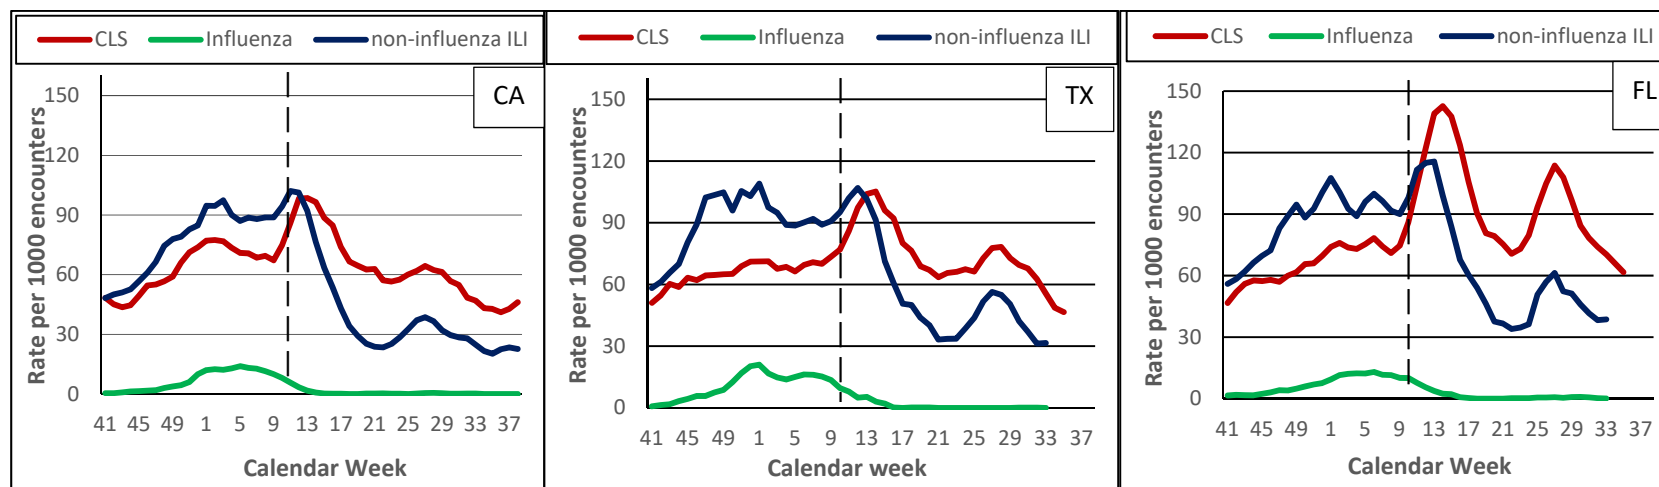

*Figure S1 a. 2019-2020*

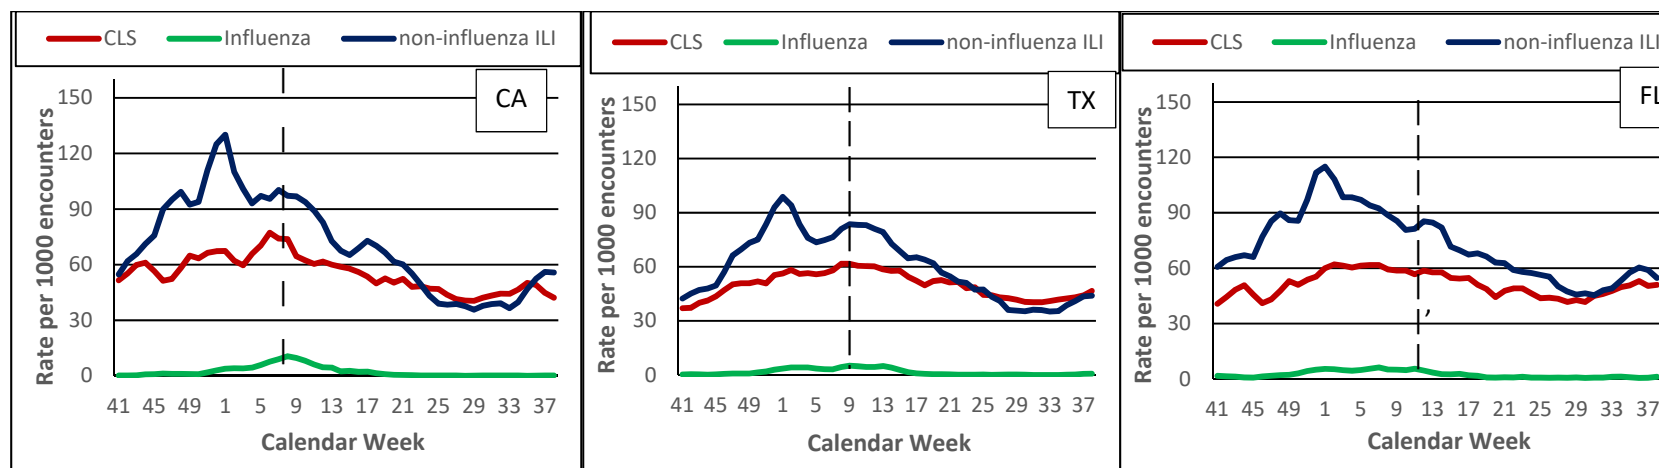

*Figure S1 b. 2018-2019*

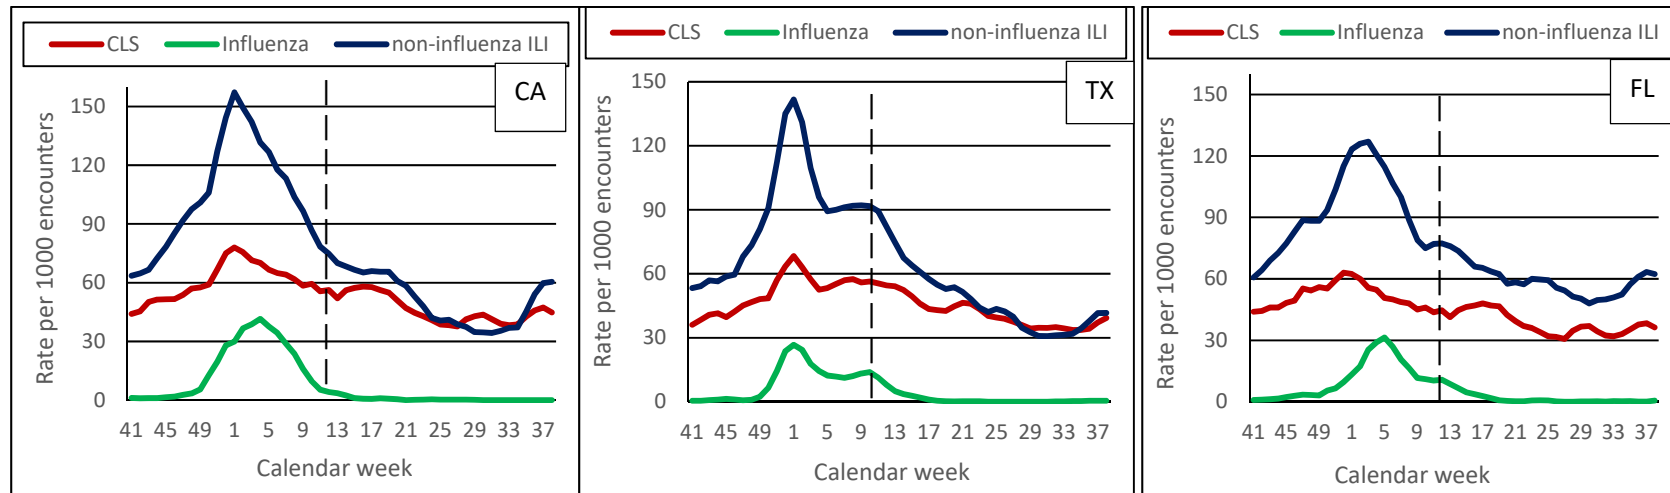

Figure S1 c. 2017-2018

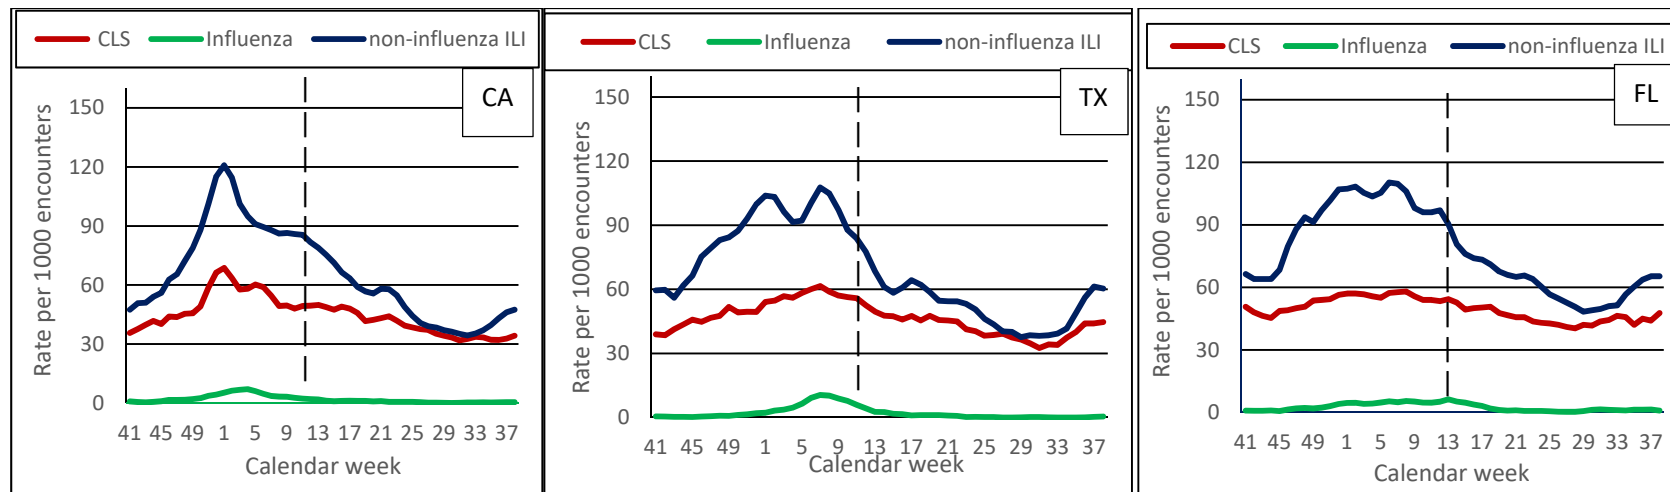

Figure S1 d. 2016-2017

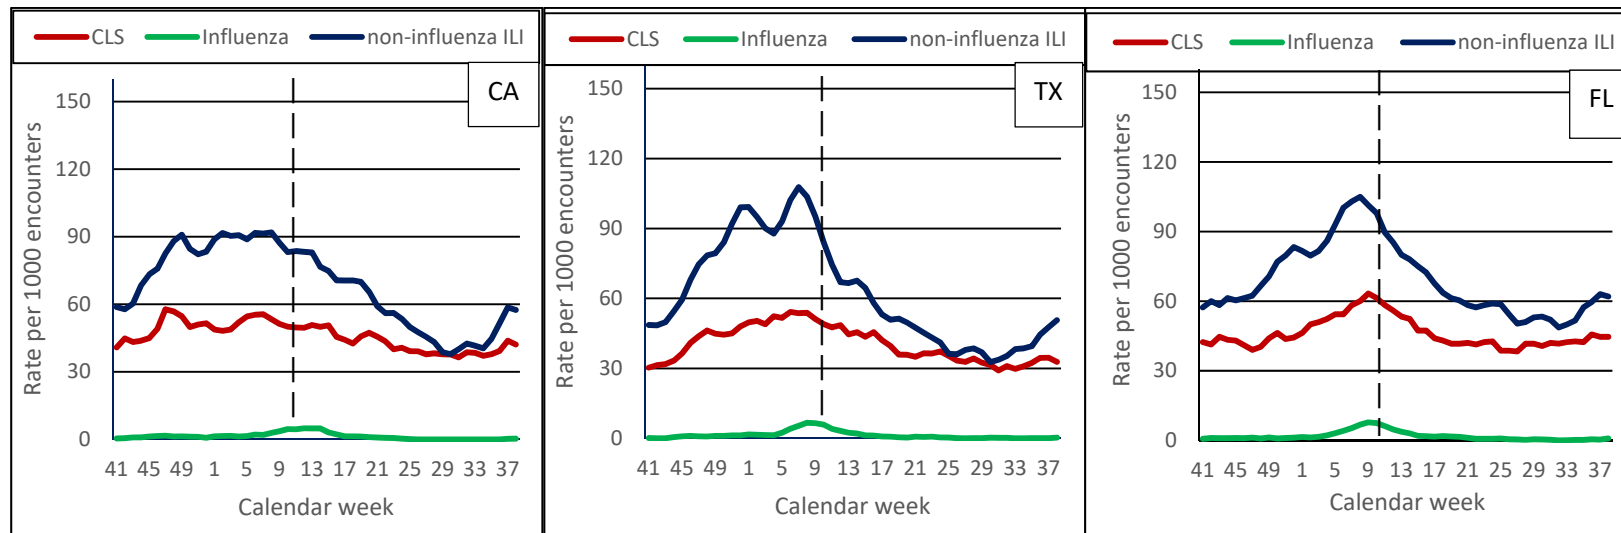

Figure S1 e. 2015-2016

**Figures S2 a-c. Rates per 1,000 ED encounters for shortness of breath, cough, and fever (CA, TX, FL) (2015-2020).**

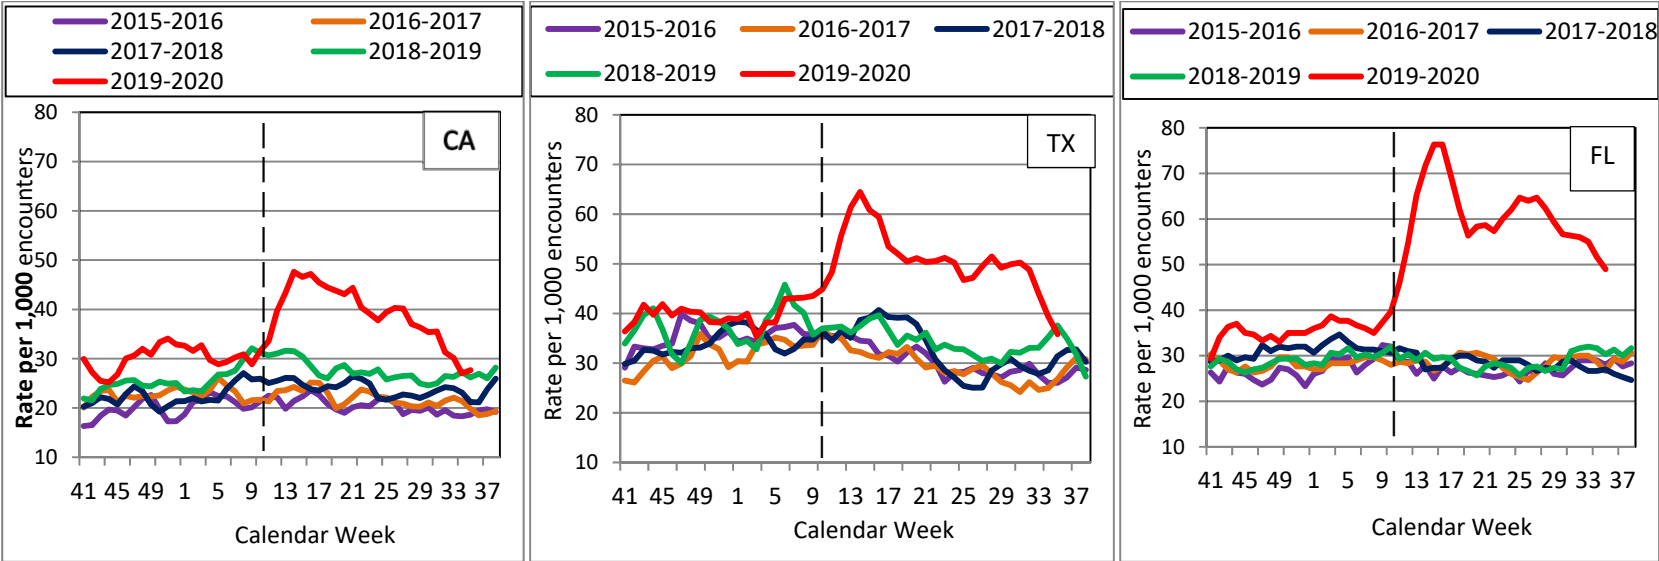

*Figure S2 a. Shortness of breath*

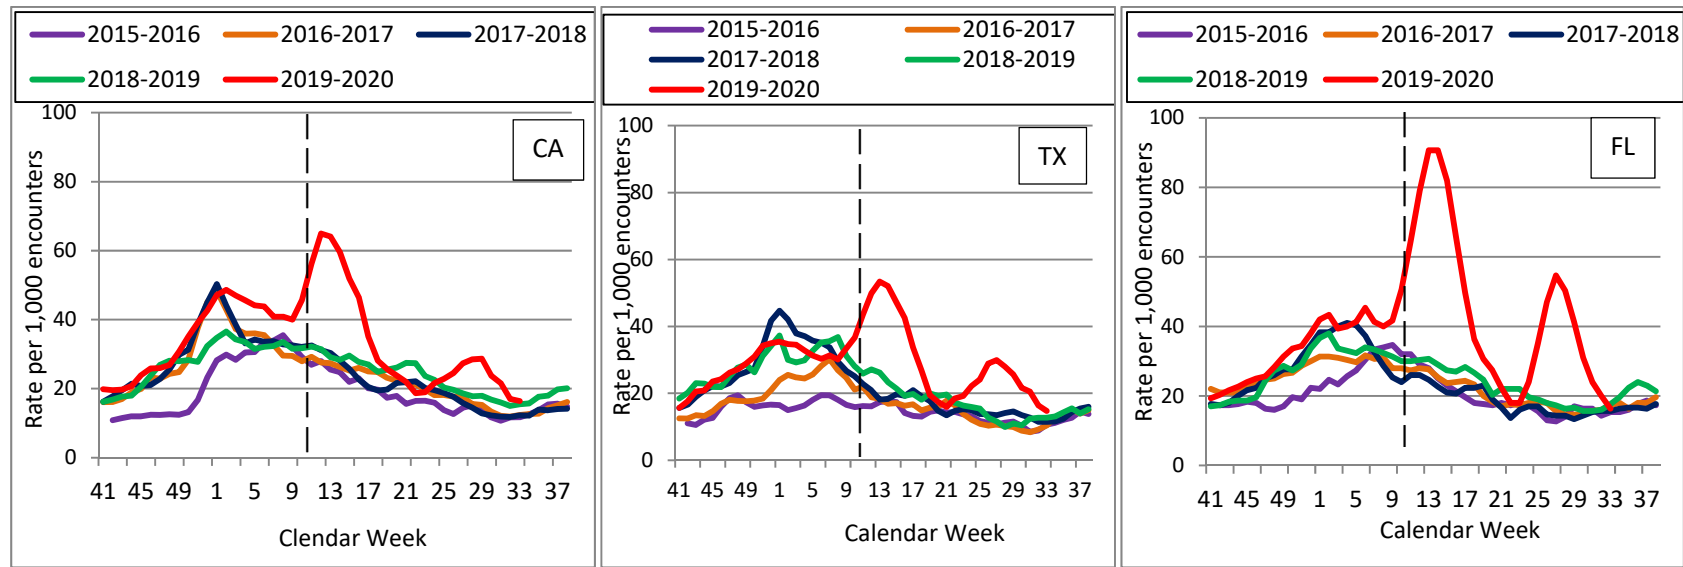

Figure S2 b. cough

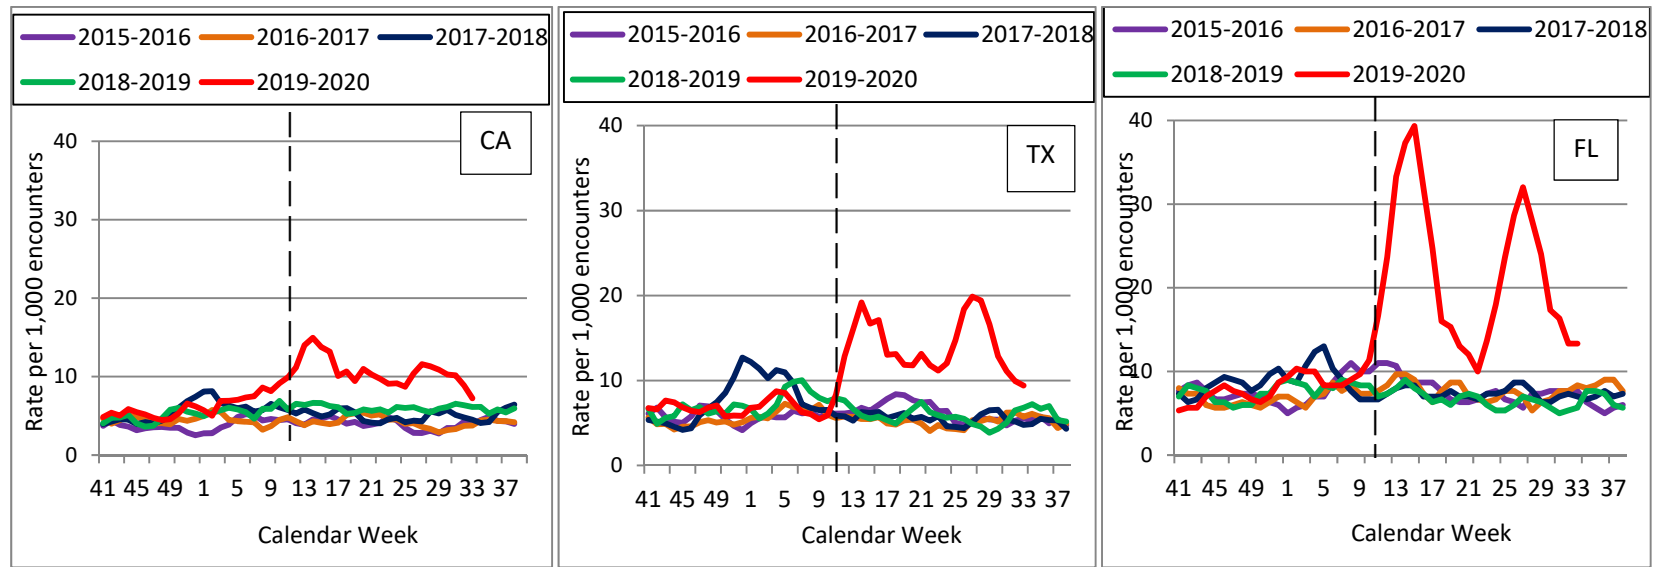

Figure S2 c. fever

**Table S1. Demographic characteristics of VA patients visiting ED from October 1, 2015 – September 30, 2020 by state and season.**

| <b>All ED visits</b>                   | <b>2015-2016</b> | <b>2016-2017</b> | <b>2017-2018</b> | <b>2018-2019</b> | <b>2019-2020</b> |
|----------------------------------------|------------------|------------------|------------------|------------------|------------------|
| <b>Number of patients*</b>             |                  |                  |                  |                  |                  |
| California                             | 107,998 (21%)    | 111,611 (21%)    | 110,850 (21%)    | 103,842 (20%)    | 85,725 (17%)     |
| Texas                                  | 80,979 (21%)     | 84,030 (21%)     | 82,382 (21%)     | 79,512 (20%)     | 65,541 (17%)     |
| Florida                                | 94,180 (20%)     | 98,141 (21%)     | 98,357 (21%)     | 97,491 (21%)     | 79,459 (17%)     |
| <b>Gender Male (%)</b>                 |                  |                  |                  |                  |                  |
| California                             | 97,118 (90%)     | 100,139 (90%)    | 99,243 (90 %)    | 93,194 (90%)     | 76,962 (90%)     |
| Texas                                  | 69,719 (86%)     | 72,085 (86%)     | 70,136 (85%)     | 67,630 (85%)     | 55,728 (85%)     |
| Florida                                | 83,515 (89%)     | 86,703 (88%)     | 86,789 (88%)     | 85,831 (88%)     | 69,901 (88%)     |
| <b>Marital status</b>                  |                  |                  |                  |                  |                  |
| <b>Married</b>                         |                  |                  |                  |                  |                  |
| California                             | 40,117 (37%)     | 41,520 (37%)     | 41,335 (38%)     | 39,255 (39%)     | 32,322 (38%)     |
| Texas                                  | 42,278 (45%)     | 44,670 (46%)     | 45,397 (46%)     | 45,024 (46%)     | 36,748 (46%)     |
| Florida                                | 42,278 (45%)     | 44,670 (46%)     | 45,397 (46%)     | 45,024 (46%)     | 36,748 (46%)     |
| <b>Divorced/Separated/<br/>Widowed</b> |                  |                  |                  |                  |                  |
| California                             | 42,279 (39%)     | 42,652 (38%)     | 41,666 (38%)     | 38864 (37%)      | 31,650 (37%)     |
| Texas                                  | 32,114 (40%)     | 33,067 (40%)     | 31,494 (38%)     | 30,102 (38%)     | 24,736 (38%)     |
| Florida                                | 35,713 (38%)     | 36,378 (37%)     | 35,863 (36%)     | 34856 (36%)      | 28,157 (35%)     |
| <b>Single/Never<br/>Married</b>        |                  |                  |                  |                  |                  |
| California                             | 24,725 (23%)     | 26,196 (23%)     | 26,378 (23%)     | 24,580 (24%)     | 20,444 (24%)     |
| Texas                                  | 12,316 (15%)     | 12,816 (15%)     | 12,887 (16%)     | 12,592 (16%)     | 10,212 (16%)     |
| Florida                                | 15,608 (17%)     | 16,339 (17%)     | 16,326 (17%)     | 16,770 (17%)     | 13,833 (17%)     |
| <b>Unknown/Missing</b>                 |                  |                  |                  |                  |                  |
| California                             | 876 (1%)         | 1,242 (1%)       | 1,469 (1%)       | 1,143 (1%)       | 1309 (1%)        |
| Texas                                  | 633 (1%)         | 747 (1%)         | 696 (1%)         | 627 (1%)         | 620 (1%)         |
| Florida                                | 581 (0.6%)       | 754 (0.8%)       | 771 (0.8%)       | 841 (0.9%)       | 721 (0.9%)       |
| <b>Race:</b>                           |                  |                  |                  |                  |                  |
| <b>White</b>                           |                  |                  |                  |                  |                  |
| California                             | 57,667 (53%)     | 58,596 (53%)     | 57,603 (52%)     | 53,615 (52%)     | 43,043 (50%)     |
| Texas                                  | 38,422 (48%)     | 39,518 (47%)     | 37,791 (46%)     | 35,767 (45%)     | 28,687 (44%)     |
| Florida                                | 60,028 (63%)     | 61,620 (63%)     | 60,040 (61%)     | 58,986 (61%)     | 47,232 (60%)     |
| <b>African American</b>                |                  |                  |                  |                  |                  |
| California                             | 19,841 (18%)     | 20,781 (19%)     | 20,665 (19%)     | 19,839 (19%)     | 16,491 (19%)     |
| Texas                                  | 24,134 (30%)     | 25,415 (30%)     | 25,832 (32%)     | 25,465 (32%)     | 21,385 (33%)     |
| Florida                                | 18,989 (20%)     | 19,594 (20%)     | 20,093 (20%)     | 20,361 (21%)     | 17,086 (22%)     |
| <b>Latino</b>                          |                  |                  |                  |                  |                  |
| California                             | 14,418 (14%)     | 15,013 (13%)     | 15,016 (14%)     | 14,557 (14%)     | 12,546 (15%)     |
| Texas                                  | 10,802 (13%)     | 11,231 (13%)     | 11,305 (14%)     | 11,123 (14%)     | 9,437 (14%)      |



| <b>All ED visits</b>                            | <b>2015-2016</b> | <b>2016-2017</b> | <b>2017-2018</b> | <b>2018-2019</b> | <b>2019-2020</b> |
|-------------------------------------------------|------------------|------------------|------------------|------------------|------------------|
| Florida                                         | 8,597 (9%)       | 10,005 (10%)     | 11,176 (11%)     | 11,155 (11%)     | 9,205 (12%)      |
| <b>Asian</b>                                    |                  |                  |                  |                  |                  |
| California                                      | 4,069 (2%)       | 4,265 (4%)       | 4,461 (4%)       | 4,278 (4%)       | 3,595 (4%)       |
| Texas                                           | 448 (0.5%)       | 497 (1%)         | 515 (1%)         | 507 (1%)         | 436 (1%)         |
| Florida                                         | 318 (0.3%)       | 331 (0.3%)       | 407 (0.4%)       | 410 (0.4%)       | 385 (0.5%)       |
| <b>Native American/Hawaiian</b>                 |                  |                  |                  |                  |                  |
| California                                      | 3,025 (3%)       | 3,164 (3%)       | 3,245 (3%)       | 3,072 (3%)       | 2,600 (3%)       |
| Texas                                           | 1,399 (2%)       | 1,496 (2%)       | 1,472 (2%)       | 1,446 (2%)       | 1,204 (2%)       |
| Florida                                         | 1,274 (1%)       | 1,410 (1%)       | 1,459 (1%)       | 1,415 (1%)       | 1,206 (1.5%)     |
| <b>Unknown/Missing</b>                          |                  |                  |                  |                  |                  |
| California                                      | 8,978 (8%)       | 9,791 (9%)       | 9,855 (9%)       | 8481 (8%)        | 7,450 (9%)       |
| Texas                                           | 5,774 (7%)       | 58,73 (7%)       | 5467 (7%)        | 5,204 (7%)       | 4392 (7%)        |
| Florida                                         | 4,974 (5%)       | 5,181 (5%)       | 51,83 (5%)       | 5,164 (5%)       | 4,345 (5%)       |
| <b>Mean age</b>                                 |                  |                  |                  |                  |                  |
| California                                      | 58               | 59               | 59               | 60               | 60               |
| Texas                                           | 56               | 56               | 57               | 57               | 58               |
| Florida                                         | 60               | 60               | 60               | 60               | 61               |
| <b>Number of ED visits per patient per year</b> |                  |                  |                  |                  |                  |
| California                                      | 2.0              | 2.0              | 2.0              | 2.0              | 2.0              |
| Texas                                           | 1.9              | 1.9              | 1.9              | 1.9              | 1.9              |
| Florida                                         | 1.9              | 1.9              | 2                | 2                | 1.9              |
| <b>Number of weeks visited per year</b>         |                  |                  |                  |                  |                  |
| California                                      | 1.9              | 1.9              | 1.9              | 1.9              | 1.8              |
| Texas                                           | 1.8              | 1.8              | 1.8              | 1.8              | 1.8              |
| Florida                                         | 1.8              | 1.9              | 1.8              | 1.9              | 1.8              |

\* Percent of 5-year total, the rest of percentages are from the season total.

**Table S2. Demographic characteristics of VA patients visiting ED for CLS from October 1, 2015 – September 30, 2020 by state and season.**

| <b>COVID-like symptoms</b>        | <b>2015-2016</b> | <b>2016-2017</b> | <b>2017-2018</b> | <b>2018-2019</b> | <b>2019-2020</b> |
|-----------------------------------|------------------|------------------|------------------|------------------|------------------|
| <b>Number of patients*</b>        |                  |                  |                  |                  |                  |
| California                        | 7,426 (7%)       | 8,476 (8%)       | 8,668 (8%)       | 8,888 (8.5%)     | 8,974 (10%)      |
| Texas                             | 5,809 (7%)       | 6,223 (7%)       | 6,948 (8%)       | 7,096 (9%)       | 6,937 (11%)      |
| Florida                           | 7,252 (7%)       | 8,200 (8%)       | 8,248 (8%)       | 8439 (9%)        | 10,082 (13%)     |
| <b>Gender Male (%)</b>            |                  |                  |                  |                  |                  |
| California                        | 6,684 (90%)      | 7,650 (90%)      | 7,831 (90%)      | 8,058 (91%)      | 8,081 (90%)      |
| Texas                             | 5,163 (88%)      | 5,501 (88%)      | 6,070 (87%)      | 6,239 (88%)      | 5,992 (86%)      |
| Florida                           | 6471 (89%)       | 7,362 (90%)      | 7,418 (90%)      | 7,587 (90%)      | 8,941 (89%)      |
| <b>Marital status Married</b>     |                  |                  |                  |                  |                  |
| California                        | 3,053 (41%)      | 3,484 (41%)      | 3,542 (41%)      | 3,575 (40%)      | 3,524 (39%)      |
| Texas                             | 2,765 (48%)      | 2,951 (47%)      | 3,266 (47%)      | 3,245 (46%)      | 3,317 (48%)      |
| Florida                           | 3,624 (50%)      | 4,079 (50%)      | 4,135 (50%)      | 4,313 (51%)      | 4,907 (49%)      |
| <b>Divorced/Separated/Widowed</b> |                  |                  |                  |                  |                  |
| California                        | 2,943 (40%)      | 3,278 (39%)      | 3,326 (39%)      | 3,447 (39%)      | 3,339 (37%)      |
| Texas                             | 2,386 (41%)      | 2518 (41%)       | 2805 (41%)       | 2901 (41%)       | 2665 (38%)       |
| Florida                           | 2,727 (37%)      | 3,068 (37%)      | 3,044 (37%)      | 2,992 (35%)      | 3630 (36%)       |
| <b>Single/Never Married</b>       |                  |                  |                  |                  |                  |
| California                        | 1,400 (19%)      | 1,655 (20%)      | 1,750 (20%)      | 1,815 (20%)      | 2,014 (22%)      |
| Texas                             | 641 (11%)        | 727 (12%)        | 849 (12%)        | 927 (13%)        | 917 (13%)        |
| Florida                           | 879 (12%)        | 1,023 (12%)      | 1,033 (13%)      | 1,103 (13%)      | 1,497 (15%)      |
| <b>Unknown/Missing</b>            |                  |                  |                  |                  |                  |
| California                        | 30 (0.4%)        | 59 (0.7%)        | 50 (0.6%)        | 51 (0.6%)        | 97 (1%)          |
| Texas                             | 17 (0.3%)        | 27 (0.4%)        | 26 (0.4%)        | 23 (0.3%)        | 38 (1%)          |
| Florida                           | 22 (0.3%)        | 30 (0.3%)        | 26 (0.3%)        | 31 (0.4%)        | 48 (0.5%)        |
| <b>Race: White</b>                |                  |                  |                  |                  |                  |
| California                        | 4,002 (54%)      | 4,575 (54%)      | 4,594 (53%)      | 4,695 (53%)      | 4,469 (50%)      |
| Texas                             | 2,963 (51%)      | 3,127 (50%)      | 3,342 (48%)      | 3,330 (47%)      | 3,101 (45%)      |
| Florida                           | 4,841 (67%)      | 5,367 (65%)      | 5,351 (65%)      | 5,425 (64%)      | 6,116 (61%)      |
| <b>African American</b>           |                  |                  |                  |                  |                  |
| California                        | 1,495 (20%)      | 1,662 (20%)      | 1,670 (19%)      | 1,794 (20%)      | 1,745 (19%)      |
| Texas                             | 1,869 (32%)      | 1,937 (31%)      | 2093 (30%)       | 2,295 (32%)      | 2,312 (33%)      |
| Florida                           | 1,356 (19%)      | 1,523 (19%)      | 1,546 (19%)      | 1,681 (20%)      | 2,150 (21%)      |
| <b>Latino</b>                     |                  |                  |                  |                  |                  |
| California                        | 863 (12%)        | 958 (11%)        | 1,011 (12%)      | 1,039 (12%)      | 1,274 (14%)      |
| Texas                             | 570 (10%)        | 643 (10%)        | 907 (13%)        | 872 (12%)        | 933 (13%)        |

| <b>COVID-like symptoms</b>                   | <b>2015-2016</b> | <b>2016-2017</b> | <b>2017-2018</b> | <b>2018-2019</b> | <b>2019-2020</b> |
|----------------------------------------------|------------------|------------------|------------------|------------------|------------------|
| Florida                                      | 585 (8%)         | 792 (10%)        | 846 (10%)        | 794 (9%)         | 1,147 (11%)      |
| <b>Asian</b>                                 |                  |                  |                  |                  |                  |
| California                                   | 314 (4%)         | 385 (5%)         | 415 (5%)         | 396 (4%)         | 439 (5%)         |
| Texas                                        | 18 (0.3%)        | 32 (0.5%)        | 38 (0.5%)        | 37 (0.5%)        | 36 (0.5%)        |
| Florida                                      | 23 (0.3%)        | 19 (0.2%)        | 21 (0.3%)        | 24 (0.3%)        | 45 (0.5%)        |
| <b>Native American/Hawaiian</b>              |                  |                  |                  |                  |                  |
| California                                   | 216 (3%)         | 227 (3%)         | 270 (3%)         | 249 (3%)         | 277 (3%)         |
| Texas                                        | 77 (1%)          | 110 (2%)         | 115 (2%)         | 138 (2%)         | 148 (2%)         |
| Florida                                      | 92 (1%)          | 121 (1%)         | 99 (1%)          | 108 (1%)         | 145 (1%)         |
| <b>Unknow/Missing</b>                        |                  |                  |                  |                  |                  |
| California                                   | 536 (7%)         | 669 (8%)         | 708 (8%)         | 715 (8%)         | 770 (9%)         |
| Texas                                        | 312 (5%)         | 374 (6%)         | 453 (7%)         | 424 (6%)         | 407 (6%)         |
| Florida                                      | 355 (5%)         | 378 (5%)         | 385 (5%)         | 407 (5%)         | 479 (5%)         |
| <b>Mean age</b>                              |                  |                  |                  |                  |                  |
| California                                   | 63               | 63               | 64               | 64               | 63               |
| Texas                                        | 63               | 63               | 62               | 63               | 62               |
| Florida                                      | 63               | 63               | 62               | 63               | 62               |
| <b>Number of visits per patient per year</b> |                  |                  |                  |                  |                  |
| California                                   | 1.2              | 1.2              | 1.2              | 1.2              | 1.2              |
| Texas                                        | 1.2              | 1.2              | 1.2              | 1.2              | 1.2              |
| Florida                                      | 1.2              | 1.2              | 1.2              | 1.2              | 1.2              |

\* % are from season total listed in Table1; all the other percentages are from COVID-like symptoms season total.
